# Supplementary material
Source: PubMed Central journal article supplement (PMC3098694)
Supplement: tjp0589-2147-SD1.pdf [file tjp0589-2147-SD1.pdf]

| M              | model    | dur.        | % atrophy or force decline* | lipid per. & protein ox. | ROS produc. | antioxid. defense systems | protein synt. & degr. | A     | reference                      |
|----------------|----------|-------------|-----------------------------|--------------------------|-------------|---------------------------|-----------------------|-------|--------------------------------|
| <b>animals</b> |          |             |                             |                          |             |                           |                       |       |                                |
| dia            | MV, rat  | 18 h        | 15-30                       | ↑LP, ↑PO                 |             |                           | ↑PD, ↑calp, ↑UP       |       | (Shanely <i>et al.</i> , 2002) |
| dia            | MV, rat  | 6, 12, 18 h |                             |                          |             |                           | ↓PS                   |       | (Shanely <i>et al.</i> , 2004) |
| dia            | MV, rat  | 12 h        |                             |                          | ↑DCFH       | ↓GSH, ↓GPX, ↑HO-1, ↓SOD   |                       |       | (Falk <i>et al.</i> , 2006)    |
| dia            | MV, rat  | 12 h        | ~15*(force)                 |                          |             | ↓GSH ↓thiols              | ↑PD                   |       | (Betters <i>et al.</i> , 2004) |
|                |          |             | =                           |                          |             | ↓GSH ↓thiols              | =PD                   | tro   |                                |
| dia            | MV, rat  | 18 h        | ~40                         | ↑PO                      |             | ↓GSH                      | ↑UP (MuRF-1 & atr-1)  |       | (McClung <i>et al.</i> , 2007) |
|                |          |             | ~10                         | =PO                      |             | ↓GSH                      | ↑UP (MuRF-1 & atr-1)  | tro   |                                |
| dia            | Mv, rat  | 12 h        | ~20-30<br>~20*(force)       | ↑PO, ↑LP                 |             |                           | ↑calp, ↑casp          |       | (Whidden <i>et al.</i> , 2010) |
|                |          |             | =                           | no PO, no LP             |             |                           | =calp, =casp          | tro   |                                |
| sol            | imm, rat | 4, 8, 12 d  | 20-50 (rate)                | ↑LP (60%)                |             | ↑GSSX/GSH, ↑ Fe           |                       |       | (Kondo <i>et al.</i> , 1992)   |
|                |          | 12 d        | ~35 (rate)                  | ↑LP (20%)                |             |                           |                       | vit E |                                |

| M         | model    | dur.       | % atrophy or force decline*            | lipid per. & protein ox. | ROS produc.      | antioxid. defense systems                       | protein synt. & degr. | A     | reference                         |
|-----------|----------|------------|----------------------------------------|--------------------------|------------------|-------------------------------------------------|-----------------------|-------|-----------------------------------|
| sol       | imm, rat | 4, 8, 12 d | 19-51                                  |                          |                  | ↑SOD, ↓MnSOD, =Se-GPX, =cat, ↑GST, ↑GSHRx, ↑XOD |                       |       | (Kondo <i>et al.</i> , 1993)      |
| sol       | HU, rat  | 28 d       | 45                                     |                          | ↑DCFH, ↑tot hydr | ↑SOD, ↓MnSOD, ↓cat, ↓GPX, ↓ASC                  |                       |       | (Lawler <i>et al.</i> , 2003)     |
| sol       | HU, rat  | 28 d       | 55                                     |                          | ↑tot hydr        | ↓GPX, ↓Hsp70, ↓Hsp25                            |                       |       | (Lawler <i>et al.</i> , 2006)     |
| sol       | imm, rat | 8 d        | 35                                     |                          |                  | ↓GSH (small)                                    |                       |       | (Appell <i>et al.</i> , 1997)     |
|           |          |            | 12                                     |                          |                  | =GSH                                            |                       | vit E |                                   |
| sol & gas | HU       | 14 d       | 44 (sol)<br>30 (gas)<br>28* (force)    | ↑PO,<br>↑LP              |                  |                                                 |                       |       | (Koesterer <i>et al.</i> , 2002)  |
|           |          |            | ~44 (sol)<br>~30 (gas)<br>~28* (force) | ↑PO,<br>↑LP              |                  |                                                 |                       | vit E |                                   |
| sol       | HU, mice | 12 d       | 44-38<br>64*(force)                    |                          | ↑ox act          |                                                 |                       |       | (Matuszczak <i>et al.</i> , 2004) |
|           |          |            | 44-38<br>*force recovers               |                          |                  |                                                 |                       | AI    |                                   |
| sol       | HU, mice | 12 d       | ~40                                    |                          | ↑DCFH            |                                                 | =ser prot             |       | (Arbogast <i>et al.</i> , 2007)   |
|           |          |            | ~15                                    |                          | =DCFH            |                                                 | ↓ser prot             | BBIC  |                                   |

| M   | model    | dur.   | % atrophy or force decline* | lipid per. & protein ox. | ROS produc.                            | antioxid. defense systems                   | protein synt. & degr.      | A     | reference                       |
|-----|----------|--------|-----------------------------|--------------------------|----------------------------------------|---------------------------------------------|----------------------------|-------|---------------------------------|
|     |          |        |                             |                          |                                        |                                             |                            |       |                                 |
| gas | HU, rat  | 5-10 d | ~20                         | ↑LP                      |                                        | ↓GSH, ↑GSSG, ↓GSH/GSSG                      | ↑UP                        |       | (Ikemoto <i>et al.</i> , 2002a) |
|     |          |        | partial restoration         | =LP                      |                                        | partial restoration of GSH, GSSH, GSH/GSSG, | =UP                        | cyst  |                                 |
| gas | HU, rat  | 2-21 d | ~10                         | ↑LP                      |                                        | ↓GSH, ↑GSSG                                 | ↑UP                        |       | (Ikemoto <i>et al.</i> , 2002b) |
|     |          |        | ~10                         | ↑LP                      |                                        | ↓GSH, ↑GSSG                                 | ↑UP                        | vit E |                                 |
| sol | HU, rat  | 14 d   | 49                          | ↑LP                      |                                        | ↓GSH/GSSG, ↑SOD, ↑GPX, ↑cat                 | ↑casp-3-9, ↑atr-1, ↑MuRF-1 |       | (Servais <i>et al.</i> , 2007)  |
|     |          |        | 32                          | ↓LP                      |                                        | ↓GSH/GSSG, ↑SOD, ↑GPX, ↑cat                 | ↓casp-3-9, ↓atr-1, ↓MuRF-1 | vit E |                                 |
| sol | HU, mice | 14 d   | 22                          | ↑LP, ↑PO                 |                                        | ↑SOD, ↓CAH-III, ↓PRX-6, ↓Hsp <sub>s</sub>   |                            |       | (Brocca <i>et al.</i> , 2010)   |
|     |          |        | 22                          | =LP, =PO                 |                                        | ↑SOD, ↑CAH-III, ↑PRX-6, ↑Hsp <sub>s</sub>   |                            | tro   |                                 |
| gas | HU, rat  | 14 d   | 12                          | ↑LP                      | =H <sub>2</sub> O <sub>2</sub> , ↑nitr | =SOD, =MnSod, =cat                          |                            |       | (Siu <i>et al.</i> , 2008)      |
| gas | HU, mice | 14 d   | 10                          | =LP, =PO                 |                                        | ↑SOD, ↑MnSOD, ↑PRX-6, ↑CAH-III              |                            |       | (Brocca <i>et al.</i> , 2010)   |
|     |          |        | 10                          | =LP, ↓PO                 |                                        | ↑*CAH-III, ↑*PRX-6, ↑*Hsp60                 |                            | tro   |                                 |

| M             | model | dur.     | % atrophy or force decline* | lipid per. & protein ox. | ROS produc. | antioxid. defense systems                          | protein synt. & degr.       | A | reference                           |
|---------------|-------|----------|-----------------------------|--------------------------|-------------|----------------------------------------------------|-----------------------------|---|-------------------------------------|
| <b>humans</b> |       |          |                             |                          |             |                                                    |                             |   |                                     |
| dia           | MV    | 1-69 h   | 53-57                       |                          |             | ↓GSH, ↑casp                                        | ↑UP (atr-1, MuRF-1)         |   | (Levine <i>et al.</i> , 2008)       |
| VL            | BR    | 20 d     | 3-5                         |                          |             |                                                    | ↑UP, ↑MuRF-1, ↑atr-1,       |   | (Ogawa <i>et al.</i> , 2006)        |
| VL            | BR    | 7, 35 d  | 0-18                        | =PO (8d), ↑PO (35d)      |             | ↑HO-1 (8d), =HO-1 (35d), ↑Grp75 (8d), =Grp75 (35d) |                             |   | (Dalla Libera <i>et al.</i> , 2009) |
| VL            | ULLS  | 10, 23 d | 5-10                        |                          |             |                                                    | ↓PS, =mTor, ↓MuRF-1, ↓atr-1 |   | (de Boer <i>et al.</i> , 2007)      |
| VL            | imm   | 2, 14 d  | 5-6                         | =LP, =PO                 |             | ↑UPc (2d), =UPc (14d)<br>=casp (2-14d)             |                             |   | (Glover <i>et al.</i> , 2010)       |

Table 1. Summary of the key literature cited related to muscle atrophy and oxidative stress in order of appearance. Only major findings per reference are reported. Antioxidant treatments have gray background. All symbols refer to comparison with controls, i.e. between disuse atrophy and controls or between disuse atrophy following treatment and controls.

## Abbreviations:

↑ = higher than control

↓ = lower than control

= unchanged with respect to control

A= antioxidant treatment

Al = allopurinol

ASC= antioxidant scavenging capacity

atr-1= atrogin-1

BBIC= Bowman-Birk inhibitor

BR= bed rest

CAH=carbonic anhydrase

calp= calpain

casp= caspase

cat= catalase

cyst= cysteine

DCFH = dichlorofluorescin diacetate oxidation (index of ROS content)

dia= diaphragm

dur= duration

gas= gastrocnemius

GPX=glutathione peroxidase

Grp-75= glucose-regulated protein-75 or mitochondrial

GSH= glutathione

GSHRx= glutathione reductase

GST= glutathione S-transferase

HO-1=heme oxygenase-1, heat shock protein-70 or mortalin

HU=hindlimb unloading

imm= immobilization

lipid per. =lipid peroxidation

LP= lipid peroxidation

M= muscle

MV= mechanical ventilation

nitr= nitrothirosine content

ox act= oxidant activity

PD= protein degradation

PO= protein oxidation

protein ox.= protein oxidation

protein stynth & degr = protein synthesis and degradation

PRX=peroxiredoxin

PS= protein synthesis

ROS produc.= ROS production

ser prot= serine proteases

SOD= copper-zinc superoxide dismutase

sol= soleus

tot hydr= total hydroperoxides

tro= trolox

UP= ubiquitin proteasome activity

UPc= ubiquitin proteasome conjugates

VL= vastus lateralis

XOD= xanthine oxidase
